# Supplementary material
Source: publisher site journal article supplement (https://www.dovepress.com/article/262444)
Supplement: Supplementary file 1 [file get_supplementary_file.php]

**Supplementary Appendix**

**Contents Page**

S1. Medical instruction for diabetic patients, English version 2

S2. Pre- and postoperative standardized protocol (subcutaneous insulin), English version 3-5

S3. Pre- and postoperative standardized protocol (intravenous insulin), English version 6-7

S4. Conventional protocol, English version 8

S5. Medical instruction for diabetic patients, Thai version 9

S6. Pre- and post- operative glycemic control protocol (subcutaneous insulin), Thai version 10-12

S7. Pre- and post-operative glycemic control protocol (intravenous insulin), Thai version 13-15

S8. Conventional protocol, Thai version 16

**S1. Medication instructions for diabetic patients**

| **24 HOURS PRIOR TO SURGERY** | |
| --- | --- |
| **Date** | **Instructions** |
|  | 🞎 Diabetic agents  🞎Metformin (……………………………………….): stop at least 24 hours before surgery  🞎Sulfonylurea (…………………………………….): take usual dose  🞎Thiazolidinedione (……………………………..): take usual dose  🞎DPP-4 inhibitor (………………………………….): take usual dose  🞎SGLT-2 inhibitor (…………………………………): stop at least 24 hours before surgery  🞎GLP1-RA (…………………………………): stop at least 24 hours before surgery  🞎α-glucosidase inhibitor (…………………………): take usual dose  🞎 NPH insulin Usual dose = …………………………. units;  🞎Adjusted dose = 80% of usual dose = ……………………. units, Time……………...  **If patient has poor oral intake, bowel preparation, liquid diet:  🞎 Adjusted dose = 50% of usual dose = ……………………units, Time………………  🞎 Long-acting insulin (……………………………….) Usual dose = …………………………. units;  🞎Adjusted dose = 80% of usual dose = ……………………. units, Time……………...  **If patient has poor oral intake, bowel preparation, liquid diet:  🞎 Adjusted dose = 50% of usual dose = ……………………units, Time………………  🞎 Premixed insulin (………………………………….) Usual dose = …………………………. units;  🞎 Adjusted dose = 80% of usual dose = ……………………. units, Time……………...  **If patient has poor oral intake, bowel preparation, liquid diet:  🞎 Adjusted dose = 50% of usual dose = ……………………units, Time……………… |

**S2. Preoperative glycemic control protocol (Subcutaneous insulin)***

| **DAY OF SURGERY** | |
| --- | --- |
| **Date** | **Instructions** |
|  | - NPO after 24:00 - Hold all oral diabetes drugs and insulin - 0.9% NaCI (1000ml) IV drip rate ……………………….ml/hr (depending on volume status) - Capillary blood glucose (CBG) at 06:00 = ……………………mg/dL  If CBG >120 mg/dl, follow the protocol below:   🞎 NPH insulin (usual dose = ……………. units)  🞎 NPH ………………. units sc after CBG (50% of usual dose)  🞎 Premixed insulin ………………………... (usual dose = ……………. units)  🞎 premixed (…………………) ….………. units sc after CBG (50% of usual dose)  🞎 Long-acting insulin ……………………. (if using long acting insulin in morning) (usual dose = ……………. units)  🞎 long-acting insulin (………………………) ……………. units sc after CBG (80% of usual dose)   - CBG every 4 hours - If CBG < 100 mg/dL stop 0.9% NaCI and start  5% D/………… 1000 ml IV rate ……………….ml/hr - Regular insulin (RI) sc when CBG >180 mg/dl as per the protocol below:  | **CBG (mg/dl)** | **Regimen 1**  **(Age >70 yr, GFR <50)**  **🞎** | **Regimen 2**  **🞎** | **Regimen 3**  **(BMI >35, Total insulin dose >80U,**  **Prednisolone >20 mg)**  **🞎** | | --- | --- | --- | --- | |  | Regular insulin (units) | | | | 181-220 | 2 | 3 | 4 | | 221-260 | 3 | 4 | 5 | | 261-300 | 4 | 6 | 8 | | 301-350 | 5 | 8 | 10 | | 351-400 | 6 | 10 | 12 | | >400 | 8 | 12 | 14 |  - If CBG <70 mg/dL 🡪 50% glucose 25 ml IV push and repeat CBG every 30 min until CBG >100mg/dL |

*Adapted from: Duggan EW, Carlson K, Umpierrez GE. Perioperative Hyperglycemia ManagementAn Update. *Anesthesiology: The Journal of the*

*American Society of Anesthesiologists.* 2017;126(3):547-560.

**S2. Postoperative Glycemic Control Order (Subcutaneous insulin)***

**At ward**

| **Date** | **Instructions** |
| --- | --- |
|  | - If prolonged NPO expected (>1 day), notify endocrinologist on first postoperative day - **If NPO**: - Capillary blood glucose (CBG) every 6 hours - If on 0.9% NaCI, switch to 5% D/NSS rate ………………ml/hr if expected NPO time >24 hours - Insulin as follows: - 🞎 Glargine (0.1-0.2 unit/kg or 80% of usual dose) = ……………sc at 20:00   🞎 NPH (0.1-0.2 unit/kg or 80% of usual dose) = ……………… sc at 08:00 and 20:00   - If CBG >180 mg/dL (at ward ICU) or >140 mg/dL (general ward) add RI sc every 6 hours after CBG according to the protocol below:  | **CBG (mg/dl)** | **Regimen 1**  **(age >70 yr, GFR <50)**  **🞎** | **Regimen 2**  **🞎** | **Regimen 3**  **(BMI >35, Total insulin dose >80U, Pred >20 mg)**  **🞎** | | --- | --- | --- | --- | |  | Regular insulin (units) | | | | 141-180 | 0 | 2 | 3 | | 181-220 | 2 | 3 | 4 | | 221-260 | 3 | 4 | 5 | | 261-300 | 4 | 6 | 8 | | 301-350 | 5 | 8 | 10 | | 351-400 | 6 | 10 | 12 | | >400 | 8 | 12 | 14 |   If CBG <70 mg/dL 🡪 50% glucose 25 ml IV push and repeat CBG every 30 min until CBG >100mg/dL |

*Adapted from: Duggan EW, Carlson K, Umpierrez GE. Perioperative Hyperglycemia ManagementAn Update. *Anesthesiology: The Journal of the*

*American Society of Anesthesiologists.* 2017;126(3):547-560.

| **Date** | **Instructions** |
| --- | --- |
|  | - **If off NPO** - **Withhold oral diabetes medication and insulin if patient has reduced oral intake and start insulin as specified below:** - CBG premeal - keep target CBG at 100-140 mg/dL - Glargine (0.1-0.2 unit/kg or 80% of usual dose) = …………..sc at 20:00 - NPH (0.1-0.2 unit/kg or 80% of usual dose) = ……………… sc at 08:00 and 20:00 - Regular insulin (RI) sc premeal as per the protocol below:  | **Blood glucose (mg/dl)** | **Regimen 1**  **(age >70 yrs, GFR<50)**  **🞎** | **Regimen 2**  **🞎** | **Regimen 3**  **(BMI >35, Total insulin dose >80U,**  **Pred >20 mg)**  **🞎** | | --- | --- | --- | --- | |  | Regular insulin (units) | | | | 141-180 | 0 | 2 | 3 | | 181-220 | 2 | 3 | 4 | | 221-260 | 3 | 4 | 5 | | 261-300 | 4 | 6 | 8 | | 301-350 | 5 | 8 | 10 | | 351-400 | 6 | 10 | 12 | | >400 | 8 | 12 | 14 |   If CBG <70 mg/dL 🡪 50% glucose 25 ml IV push and repeat CBG every 30 min until CBG >100 mg/dL   - **Restart current diabetic drugs if stable and oral intake normal**   ***** except: SGLT2i and GLP1-RA (………………………………….) restart only after discharge   - Restart all oral diabetes drugs and usual insulin dose after discharge - If uncontrolled blood glucose during admission, notify endocrinologist   ***** Do not start the following drugs if:   - Metformin: acute kidney injury, eGFR <30, plan for IV contrast - Sulfonylurea: acute kidney injury, poor intake - Thiazolidinedione: edema, heart failure |

**S3. Preoperative glycemic control protocol (Insulin infusion)***

| **Date** | **Instructions** |
| --- | --- |
|  | - NPO after 24:00 - 0.9% NaCI (1,000 ml) IV rate ………………… ml/hr (depending on volume status) - Capillary blood glucose (CBG) every 2 hours; if CBG >180 mg/dL, off 0.9% NaCl and start   5% D/………. 1000 ml +……………………IV rate ……………ml/hr (If K<4 mEq/L add KCI 20 mEq in 5% D) and start intravenous insulin by:  🞎 Regular insulin bolus **initiate dose as listed in the Table1* (RI bolus (unit))**  🞎 Follow by RI 10 unit + 0.9% NaCI 100 ml IV drip…………………ml/hr (…………. unit/hr)  (Start Infusion rate as listed in **Table 1* (Infusion rate (unit/hour)**)   - CBG every 2 hours - Adjust insulin infusion rate as in **Table 2α** (keep CBG target at 140-180 mg/dL)  | **Table 1*** | | | | --- | --- | --- | | **CBG (mg/dL)** | **RI bolus (units)** | **Infusion rate (unit/hour)** | | 181-200 | 2 | 0.5 | | 201-250 | 2 | 1 | | 251-300 | 3 | 1.5 | | 301-350 | 3 | 2 | | >351 | 4 | 3 |  | **Table 2α** | | | --- | --- | | **CBG (mg/dL)** | **Action** | | <70 | Stop insulin infusion and give 50% glucose 25 ml IV, then CBG every15 min until CBG >100 mg/dL, then CBG every 2 hours | | 71-110 | Stop insulin infusion, then CBG every 2 hours | | 111-140 | Decrease to 50% of previous rate (Stop insulin if previous rate = 0.5 unit/hr) | | 141-180 | No change | | 181-200 | Increase rate 0.5 unit/hr | | 201-250 | Increase rate 1 unit/hr | | 251-300 | Increase rate 1.5 unit/hr | | 301-350 | Increase rate 2 unit/hr | | >350 | Increase rate 2.5 unit/hr | |

*Adapted from: Duggan EW, Carlson K, Umpierrez GE. Perioperative Hyperglycemia ManagementAn Update. *Anesthesiology: The Journal of the*

*American Society of Anesthesiologists.* 2017;126(3):547-560.

**S3. Postoperative glycemic control order (Insulin infusion)***

**At ward**

| **Date** | **Instructions** |
| --- | --- |
|  | - **If NPO** - Continue insulin IV drip and adjust rate as per the preoperative protocol - Keep target CBG at 140-180 mg/dL - CBG every 4 hours 🡺 If CBG stable x 3 times 🡺 change to CBG every 6 hr - **If off NPO and started oral intake** - Off IV dextrose and IV insulin at least 1 hr after starting oral diabetes drug or insulin sc (premeal)   - **If reduced oral intake:** hold all oral diabetes drugs and start insulin as listed below - CBG premeal - keep target at CBG 100-140 mg/dL   **🞎** Glargine (0.1-0.2 unit/kg or 80% of usual dose) = …………..sc at 20:00  **🞎** NPH (0.1-0.2 unit/kg or 80% of usual dose) = ……………… sc at 08.00  and 20.00  **🞎**  Regular insulin (RI) sc premeal as per the protocol below:   | **CBG (mg/dL)** | **Regimen 1**  **(age>70 yr, GFR <50)**  **🞎** | **Regimen 2**  **🞎** | **Regimen 3**  **(BMI >35, Total insulin dose >80U, Pred >20 mg)**  **🞎** | | --- | --- | --- | --- | |  | RI (units) | | | | 141-180 | 0 | 2 | 3 | | 181-220 | 2 | 3 | 4 | | 221-260 | 3 | 4 | 5 | | 261-300 | 4 | 6 | 8 | | 301-350 | 5 | 8 | 10 | | 351-400 | 6 | 10 | 12 | | >400 | 8 | 12 | 14 |  - If CBG <70 mg/dL 🡪 50% glucose 25 ml IV push and repeat CBG every 30 min until CBG >100mg/dL - **Restart current oral diabetic drugs if patient is stable and has normal oral intake**   * Except: SGLT2i and GLP1-RA (……………………………….) restart only after discharge   - Restart all oral diabetes drugs and usual insulin dose after discharge - If uncontrolled blood glucose during admission, notify endocrinologist   * Do not start the following drugs if:   - Metformin: acute kidney injury, eGFR <30, plan for IV contrast - Sulfonylurea: acute kidney injury, poor intake - Thiazolidinedione: edema, heart failure |

*Adapted from: Duggan EW, Carlson K, Umpierrez GE. Perioperative Hyperglycemia ManagementAn Update. *Anesthesiology: The Journal of the*

*American Society of Anesthesiologists.* 2017;126(3):547-560.

**S4. Conventional glycemic control protocol (CG)**

| **Date** | **Instructions** |
| --- | --- |
|  | - NPO after 24:00 - 0.9% NaCI (1,000 ml) IV rate ………………… ml/hr (depending on volume status) - Capillary blood glucose (CBG) every 2 hours, if CBG >180 mg/dL 🡺 off 0.9% NaCI and start   5% D/………. 1,000 ml, IV rate ……………ml/hr and start intravenous insulin  🞎 RI 10 units + 0.9% NaCI 100 ml IV drip…………………ml/hr (…………. unit/hr) (usual dose is 0.5-1 unit/hr)   - CBG every 2 hours - Adjust Insulin infusion rate according to **Table 1** (Keep CBG target at 100-180 mg/dL)  | **Table 1** | | | --- | --- | | **CBG (mg/dL)** | **Action** | | <70 | Stop insulin infusion and give 50% glucose 25 ml IV, then CBG every 15 min until CBG >100 mg/dL, then CBG every 2 hours | | 80-99 | Decrease rate 0.5 unit/hr | | 100-180 | No change | | 181-250 | Increase rate 0.5 unit/hr | | 251-300 | Increase rate 1 unit/hr | | 301-350 | Increase rate 1.5 unit/hr | | >350 | Increase rate 2 unit/hr |  - Off IV 5% D and insulin infusion after patient can eat per oral - Restart current diabetic drugs if patient is stable and has normal oral intake |

**S5. Medical instruction for diabetic patients (Thai version)**

| **ช่วง 24 ชั่วโมงก่อนการผ่าตัด** | |
| --- | --- |
| **Date** | **Order** |
|  | 🞎 ยาเบาหวานชนิดรับประทาน  🞎Metformin (……………………………………….) : หยุดก่อนผ่าตัดอย่างน้อย 24 ชั่วโมง  🞎Sulfonylurea (…………………………………….): รับประทานปกติถึงมื้อเย็นก่อนวันผ่าตัด  🞎Thiazolidinedione (…………………………….. .): รับประทานปกติถึงมื้อเย็นก่อนวันผ่าตัด  🞎DPP-4 inhibitor (………………………………….): รับประทานปกติถึงมื้อเย็นก่อนวันผ่าตัด  🞎SGLT-2 inhibitor (…………………………………): หยุดก่อนวันผ่าตัดอย่างน้อย 24 ชั่วโมง  🞎GLP1-RA (…………………………………): หยุดก่อนวันผ่าตัดอย่างน้อย 24 ชั่วโมง  🞎α-glucosidase inhibitor (…………………………): รับประทานปกติถึงมื้อเย็นก่อนวันผ่าตัด  🞎 NPH insulin ขนาดยาฉีดปกติ = ………………………….ยูนิต;  🞎ให้ปรับขนาดยาฉีด = 80%ของขนาดยาฉีดปกติ = …………………….ยูนิต เวลา……………..  **ในกรณีที่ผู้ป่วยทานได้น้อย ต้องทานยาถ่ายเตรียมลำไส้ หรือ ทานอาหารเหลว:  🞎 ให้ปรับขนาดยาฉีด = 50%ของขนาดยาฉีดปกติ = …………………….ยูนิต เวลา…………….  🞎Long acting insulin (……………………………….) ขนาดยาฉีดปกติ = ………………………….ยูนิต;  🞎ให้ปรับขนาดยาฉีด = 80%ของขนาดยาฉีดปกติ = …………………….ยูนิต เวลา………………  **ในกรณีที่ผู้ป่วยทานได้น้อย ต้องทานยาถ่ายเตรียมลำไส้ หรือ ทานอาหารเหลว:  🞎ให้ปรับขนาดยาฉีด = 50%ของขนาดยาฉีดปกติ = …………………….ยูนิต เวลา……………….  🞎Premixed insulin (………………………………….) ขนาดยาฉีดปกติ = ………………………….ยูนิต;  🞎ให้ปรับขนาดยาฉีด = 80%ของขนาดยาฉีดปกติ = …………………….ยูนิต เวลา………………  **ในกรณีที่ผู้ป่วยทานได้น้อย ต้องทานยาถ่ายเตรียมลำไส้ หรือ ทานอาหารเหลว:  🞎ให้ปรับขนาดยาฉีด = 50%ของขนาดยาฉีดปกติ = …………………….ยูนิต เวลา……………… |

**S6. Preoperative glycemic control protocol (Subcutaneous insulin) (Thai version)**

| **วันผ่าตัด** | |
| --- | --- |
| **Date** | **Order** |
|  | - งดน้ำและอาหารหลังเที่ยงคืน (24:00 น.) - หยุดยาเบาหวานชนิดรับประทานทุกชนิดและชนิดฉีดทุกชนิด - 0.9%NaCI (1000ml) IV drip rate ……………………….ml/hr (ขึ้นกับปริมาณสารน้ำในร่างกาย) - เจาะน้ำตาลปลายนิ้ว (CBG) เวลา 6.00 น. = ……………………mg/dL  ถ้า CBG >120 mg/dL, กรุณาให้อินซูลินตามคำสั่งด้านล่าง:   🞎NPH insulin (ขนาดยาฉีดปกติ = …………….ยูนิต)  🞎 ให้ฉีด NPH ……………….ยูนิต sc หลังเจาะ CBG (50% ของขนาดยาฉีดปกติ)  🞎 Premixed insulin ………………………..(ขนาดยาฉีดปกติ = ……………..ยูนิต)  🞎 ให้ฉีด premixed (………………………….) …..………..ยูนิต sc หลังเจาะ CBG (50% ของขนาดยาฉีดปกติ)  🞎 Long acting insulin ……………………. (กรณีฉีด long acting insulin เวลาเช้า)(ขนาดยาฉีดปกติ = ……………..ยูนิต)  🞎 ให้ฉีด long acting insulin (………………………) …………….ยูนิต sc หลังเจาะ CBG (80% ของขนาดยาฉีดปกติ)   - เจาะน้ำตาลปลายนิ้ว (CBG) ทุก 4 ชั่วโมง - ถ้า CBG <100 mg/dL ให้หยุด 0.9% NaCI และเปลี่ยนเป็น  5% D/………… 1000 ml IV rate ………………..ml/hr - ฉีด Regular insulin (RI) sc เมื่อ CBG >180 mg/dlL ตาม**คำสั่งด้านล่าง**ที่มีเครื่องหมายถูก:  | **CBG (mg/dL)** | **Regimen 1**  **(อายุ>70 ปี, GFR<50)**  **🞎** | **Regimen 2**  **🞎** | **Regimen 3**  **(BMI > 35, Total insulin dose >80U,**  **Pred >20 mg)**  **🞎** | | --- | --- | --- | --- | |  | Regular insulin (unit) | | | | 181-220 | 2 | 3 | 4 | | 221-260 | 3 | 4 | 5 | | 261-300 | 4 | 6 | 8 | | 301-350 | 5 | 8 | 10 | | 351-400 | 6 | 10 | 12 | | >400 | 8 | 12 | 14 |  - ถ้า CBG < 70 mg/dL 🡺 ให้ 50%glucose 25 ml IV push และ เจาะ CBG ซ้ำทุก 30 นาที จนกว่า CBG >100 mg/dL |

**S6. Postoperative Glycemic Control Order (Subcutaneous insulin) (Thai version)**

**หอผู้ป่วย**

| **Date** | **Order** |
| --- | --- |
|  | - กรณีมีกำหนด NPO > 1 วัน กรุณาnotify endocrinologist วันหลังผ่าตัด - **กรณีหลังผ่าตัด ช่วง NPO** ให้ปฏิบัติดังนี้: - เจาะ CBG ทุก 6 ชั่วโมง - ถ้าเดิมให้ 0.9%NaCI ให้เปลี่ยนเป็น 5%D/NSS rate ……………….เมื่อ NPO หลังผ่าตัด**เกิน 24 ชม.** - ให้ฉีดอินซูลินดังนี้ 🞎 Glargine (0.1-0.2 unit/kg or 80% of usual dose) = ……………sc เวลา 20.00 น.   🞎 NPH (0.1-0.2 unit/kg or 80% of usual dose) = ……………… sc เวลา 08.00 น และ 20.00 น.   - ถ้า CBG > 180 mg/dL (เมื่ออยู่ ward ICU) หรือ > 140 mg/dL (เมื่ออยู่ ward สามัญ) กรุณาให้ RI sc  **เพิ่ม**ทุก 6 ชั่วโมง หลังเจาะ CBG ตาม**คำสั่งด้านล่าง**ที่มีเครื่องหมายถูก:  | **CBG (mg/dL)** | **Regimen 1**  **(อายุ>70 yr, GFR<50)**  **🞎** | **Regimen 2**  **🞎** | **Regimen 3**  **(BMI > 35, Total insulin dose >80U, Pred >20 mg)**  **🞎** | | --- | --- | --- | --- | |  | Regular insulin (unit) | | | | 141-180 | 0 | 2 | 3 | | 181-220 | 2 | 3 | 4 | | 221-260 | 3 | 4 | 5 | | 261-300 | 4 | 6 | 8 | | 301-350 | 5 | 8 | 10 | | 351-400 | 6 | 10 | 12 | | >400 | 8 | 12 | 14 |   ถ้า CBG < 70 mg/dL 🡪 ให้ 50% glucose 25 ml IV push เจาะ CBG ซ้ำทุก 30 นาที จนกว่า CBG >100 mg/dL |

| **Date** | **Order** |
| --- | --- |
|  | - **หลัง off NPO** - **ถ้าหลังผ่าตัดยังทานได้น้อย** ให้หยุดยาเบาหวานชนิดรับประทานและยาฉีดเดิม และให้ อินซูลินดังนี้ - CBG ก่อนอาหาร โดยมีเป้าหมาย CBG 100-140 mg/dL - Glargine (0.1-0.2 unit/kg or 80% of usual dose) = …………..sc เวลา 20.00 น - NPH (0.1-0.2 unit/kg or 80% of usual dose) = ……………… sc เวลา 08.00 น และ 20.00 น - ให้ Regular insulin (RI) sc premeal ตาม**คำสั่งด้านล่าง**ที่มีเครื่องหมายถูก:  | **CBG (mg/dL)** | **Regimen 1**  **(อายุ >70 yr, GFR<50)**  **🞎** | **Regimen 2**  **🞎** | **Regimen 3**  **(BMI > 35, Total insulin dose >80U, Pred >20 mg)**  **🞎** | | --- | --- | --- | --- | |  | Regular insulin (unit) | | | | 141-180 | 0 | 2 | 3 | | 181-220 | 2 | 3 | 4 | | 221-260 | 3 | 4 | 5 | | 261-300 | 4 | 6 | 8 | | 301-350 | 5 | 8 | 10 | | 351-400 | 6 | 10 | 12 | | >400 | 8 | 12 | 14 |   ถ้า CBG < 70 mg/dL 🡪 ให้ 50%glucose 25 ml IV push เจาะ CBG ซ้ำทุก 30 นาที จนกว่า CBG >100 mg/dL   - **ถ้าหลังผ่าตัดทานได้ปกติ** ให้เริ่มยาเบาหวานชนิดรับประทาน หรือยาฉีดเดิมของผู้ป่วยได้ปกติ   ***** ยกเว้นการยากลุ่ม SGLT2i และ GLP1-RA (…………………………………………….) ให้หยุดจนกว่าผู้ป่วยจะกลับบ้าน   - ถ้าผู้ป่วยกลับบ้าน ให้ยาเบาหวานชนิดรับประทาน หรือยาฉีดเดิมของผู้ป่วย - ถ้าน้ำตาลระหว่างนอนโรงพยาบาลคุมไม่ได้, โปรดแจ้ง endocrinologist   ***** ชี้แจง: ข้อห้ามเริ่มยาเบาหวานในกรณีดังนี้   - Metformin: ไตวายเฉียบพลัน, eGFR <30, ฉีดสารทึบแสง (IV contrast) - Sulfonylurea: ไตวายเฉียบพลัน, ทานได้น้อย - Thiazolidinedione: ภาวะน้ำคั่งในร่างกาย (edema, heart failure) |

**S7. Preoperative glycemic control protocol (Insulin infusion) (Thai version)**

| **Date** | **Order** |
| --- | --- |
|  | - งดน้ำและอาหารหลังเที่ยงคืน (24.00 น.) - 0.9%NaCI (1000 ml) IV rate ………………… ml/hr (ขึ้นกับปริมาณสารน้ำในร่างกาย) - เจาะน้ำตาลปลายนิ้ว CBG ทุก 2 ชม, ถ้า CBG >180 mg/dl ให้หยุด 0.9%NaCI และเปลี่ยนเป็น   5%D/………. 1000 ml +……………………IV rate ……………ml/hr (ถ้า K<4 mEq/L ให้เพิ่ม KCI 20 mEq ใน 5%D)  เริ่มให้ Insulin ทางหลอดเลือด  🞎 ฉีด RI Bolus ทาง IV จำนวน 1 ครั้งตาม**ตารางที่ 1* (ช่อง RI bolus (unit))**  🞎 แล้วตามด้วย RI 10 unit + 0.9% NaCI 100 ml IV drip…………………ml/hr (…………..unit/hr)  (ให้เริ่มต้น Infusion rate ตาม**ตารางที่ 1* ช่อง Infusion rate (unit/hour)**)   - ทำการเจาะ CBG ทุก 2 ชม. - หลังจากนั้นทำการปรับ Insulin infusion rate ตาม**ตารางที่ 2α** (โดยให้มีระดับ CBG เป้าหมายเท่ากับ 140-180 mg/dL)  | **ตารางที่ 1*** | | | | --- | --- | --- | | **CBG (mg/dL)** | **RI bolus (unit)** | **Infusion rate (unit/hour)** | | 181-200 | 2 | 0.5 | | 201-250 | 2 | 1 | | 251-300 | 3 | 1.5 | | 301-350 | 3 | 2 | | >351 | 4 | 3 |  | **ตารางที่ 2α** | | | --- | --- | | **CBG (mg/dL)** | **ปฏิบัติดังนี้** | | <70 | หยุดให้อินซูลิน และให้ 50% glucose 25 ml IV และเจาะ CBG ทุก 15 min จน CBG > 100 mg/dL หลังจากนั้น CBG ทุก 2 ชั่วโมง | | 71-110 | หยุดให้ insulin ทางหลอดเลือด หลังจากนั้น CBG ทุก 2 ชั่วโมง | | 111-140 | ลด rateลง 50% ของ rate เดิม (หยุดให้ insulin ถ้า rate เดิม= 0.5 unit/hr) | | 141-180 | ให้ rate เดิม | | 181-200 | เพิ่ม rate 0.5 unit/hr | | 201-250 | เพิ่ม rate 1 unit/hr | | 251-300 | เพิ่ม rate 1.5 unit/hr | | 301-350 | เพิ่ม rate 2 unit/hr | | >350 | เพิ่ม rate 2.5 unit/hr | |

**S7. Postoperative Glycemic Control Order (Insulin infusion) (Thai version)**

**หอผู้ป่วย**

| **Date** | **Order** |
| --- | --- |
|  | - **กรณี NPO** - ให้ continue insulin IV drip ตามตารางปรับ rate insulin เดิมก่อนผ่าตัด - เป้าหมาย CBG 140-180 mg/dL - เจาะ CBG ทุก 4 ชม 🡺 ถ้า stable x 3 ครั้งติดต่อกัน ให้เปลี่ยนเป็น CBG ทุก 6 ชม - **หากจะ off NPO และเริ่มรับประทานอาหาร** - ให้ off IV dextrose และ IV insulin อย่างน้อย 1 ชั่วโมงหลังเริ่มยาเบาหวานชนิดรับประทานหรือ insulin sc (ก่อนอาหาร) - **หลัง off NPO**    - **ถ้าหลังผ่าตัดยังทานได้น้อย** ให้หยุดยาเบาหวานชนิดรับประทานและยาฉีดเดิม และให้อินซูลินดังนี้ - CBG ก่อนอาหาร โดยมีเป้าหมาย CBG 100-140 mg/dL   **🞎** Glargine (0.1-0.2 unit/kg or 80% of usual dose) = …………..sc เวลา 20.00 น.  **🞎** NPH (0.1-0.2 unit/kg or 80% of usual dose) = ……………… sc เวลา 08.00 น และ 20.00 น.  **🞎** ให้ Regular insulin (RI) sc premeal ตาม**คำสั่งด้านล่าง**ที่มีเครื่องหมายถูก:   | **CBG (mg/dL)** | **Regimen 1**  **(อายุ>70 yr, GFR<50)**  **🞎** | **Regimen 2**  **🞎** | **Regimen 3**  **(BMI > 35, Total insulin dose >80U, Pred >20 mg)**  **🞎** | | --- | --- | --- | --- | |  | Regular insulin (unit) | | | | 141-180 | 0 | 2 | 3 | | 181-220 | 2 | 3 | 4 | | 221-260 | 3 | 4 | 5 | | 261-300 | 4 | 6 | 8 | | 301-350 | 5 | 8 | 10 | | 351-400 | 6 | 10 | 12 | | >400 | 8 | 12 | 14 |  - ถ้า CBG < 70 mg/dL 🡪 ให้ 50%glucose 25 ml iv push เจาะ CBG ซ้ำทุก 30 min จนกว่า CBG >100mg/dL - **ถ้าหลังผ่าตัดทานได้ปกติ** ให้เริ่มยาเบาหวานชนิดรับประทาน หรือยาฉีดเดิมของผู้ป่วยได้ปกติ   *ยกเว้นยากลุ่ม SGLT2i และ GLP1-RA (……………….............……………….) ให้หยุดจนกว่าผู้ป่วยจะกลับบ้าน   - ถ้าผู้ป่วยกลับบ้าน ให้ยาเบาหวานชนิดรับประทาน หรือยาฉีดเดิมของผู้ป่วย - ถ้าน้ำตาลระหว่างนอนโรงพยาบาลคุมไม่ได้, โปรดแจ้ง endocrinologist   ***** ชี้แจง: ข้อห้ามเริ่มยาเบาหวานในกรณีดังนี้   - Metformin: ไตวายเฉียบพลัน, eGFR <30, ฉีดสารทึบแสง (IV contrast) - Sulfonylurea: ไตวายเฉียบพลัน, ทานได้น้อย - Thiazolidinedione: ภาวะน้ำคั่งในร่างกาย (edema, heart failure) |

**S8. Conventional glycemic control protocol (CG) (Thai version)**

| **Date** | **Order** |
| --- | --- |
|  | - งดน้ำและอาหารหลังเที่ยงคืน (24.00 น) - 0.9%NaCI (1000 ml) IV rate ………………… ml/hr (ขึ้นกับปริมาณสารน้ำในร่างกาย) - เจาะน้ำตาลปลายนิ้ว (CBG) ทุก 2 ชม, ถ้า CBG >180 mg/dl ให้หยุด 0.9%NaCI และเปลี่ยนเป็น   5%D/………. 1000 ml IV rate ……………ml/hr ร่วมกับ เริ่มให้ Insulin ทางหลอดเลือด  🞎 RI 10 unit + 0.9% NaCI 100 ml IV drip…………………ml/hr (…………. unit/hr) เริ่มให้ 0.5-1 unit/hr   - เจาะ CBG ทุก 2 ชม - หลังจากนั้นทำการปรับ Insulin infusion rate ตาม**ตารางที่ 1** (โดยให้มีระดับ CBG เป้าหมายเท่ากับ 100-180 mg/dl)  | **ตารางที่ 1** | | | --- | --- | | **CBG (mg/dL)** | **ปฏิบัติดังนี้** | | <70 | หยุดให้อินซูลิน และให้ 50% glucose 25 ml IV และเจาะ CBG ทุก 15 min จน CBG > 100 mg/dL หลังจากนั้น CBG ทุก 2 ชั่วโมง | | 80-99 | ลด rate 0.5 unit/hr | | 100-180 | ให้ rate เดิม | | 181-250 | เพิ่ม rate 0.5 unit/hr | | 251-300 | เพิ่ม rate 1 unit/hr | | 301-350 | เพิ่ม rate 1.5 unit/hr | | >350 | เพิ่ม rate 2 unit/hr |  - หยุดให้ 5%D และ IV insulin infusion หลังผู้ป่วยเริ่มรับประทานอาหารได้ - ให้เริ่มยาเดิมของผู้ป่วยหลังหยุด IV insulin infusion |
